# Supplementary material for: A molecular insight into the dissociable regulation of associative learning and motivation by the synaptic protein neuroligin-1
Source: PubMed Central journal article supplement (PMC7646379; doi:10.1186/s12915-020-00848-7), 2020-09-14
Supplement: 12915_2020_848_MOESM2_ESM.pdf [file 12915_2020_848_MOESM2_ESM.pdf]

## **Additional File 2**

### **A molecular insight into the dissociable regulation of associative learning and motivation by the synaptic protein neuroligin-1**

Jiaqi Luo<sup>1</sup>, Jessica M Tan<sup>1</sup>, Jess Nithianantharajah<sup>1</sup>

1. Florey Institute of Neuroscience and Mental Health, Florey Department of Neuroscience, Melbourne Brain Centre, University of Melbourne, Parkville Victoria Australia.

**Table S1: Variables included in regression models**

| Dependent variable                                          | Statistical model                                  | Independent variables       | Effect size | Lower CI. | Upper CI. | P value | Corresponding Figure |
|-------------------------------------------------------------|----------------------------------------------------|-----------------------------|-------------|-----------|-----------|---------|----------------------|
| Trial outcome in PD (correct or incorrect)                  | Mixed-effect generalized linear model (logit link) | Genotype                    | 0.94        | 0.81      | 1.10      | 0.47    | Figure 1C            |
|                                                             |                                                    | Sex                         | 1.07        | 0.92      | 1.25      | 0.38    |                      |
|                                                             |                                                    | Session                     | 1.11        | 1.09      | 1.13      | < 0.001 |                      |
|                                                             |                                                    | Trial within session        | 1.00        | 0.998     | 1.002     | 0.99    |                      |
|                                                             |                                                    | Stimulus location (right)   | 1.08        | 0.92      | 1.23      | 0.35    |                      |
|                                                             |                                                    | Genotype x Sex              | 0.98        | 0.72      | 1.34      | 0.88    |                      |
|                                                             |                                                    | Genotype x Session          | 0.97        | 0.93      | 1.00      | 0.064   |                      |
| Trial outcome in PAL (correct or incorrect)                 | Mixed-effect generalized linear model (logit link) | Genotype                    | 0.91        | 0.77      | 1.08      | 0.28    | Figure 1F            |
|                                                             |                                                    | Sex                         | 1.12        | 0.94      | 1.32      | 0.18    |                      |
|                                                             |                                                    | Session                     | 1.03        | 1.03      | 1.04      | < 0.001 |                      |
|                                                             |                                                    | Trial within session        | 1.00        | 0.999     | 1.001     | 0.922   |                      |
|                                                             |                                                    | Stimulus location (center)  | 0.46        | 0.39      | 0.54      | < 0.001 |                      |
|                                                             |                                                    | Stimulus location (right)   | 1.07        | 0.85      | 1.34      | 0.58    |                      |
|                                                             |                                                    | Genotype x Sex              | 0.95        | 0.63      | 1.43      | 0.81    |                      |
| Genotype x Session                                          | 0.99                                               | 0.99                        | 1.00        | 0.10      |           |         |                      |
| Trial outcome in RL (correct or incorrect)                  | Mixed-effect generalized linear model (logit link) | Genotype                    | 0.98        | 0.79      | 1.21      | 0.85    | Figure 2C            |
|                                                             |                                                    | Sex                         | 1.19        | 0.97      | 1.45      | 0.10    |                      |
|                                                             |                                                    | Session                     | 1.09        | 1.08      | 1.11      | < 0.001 |                      |
|                                                             |                                                    | Trial within session        | 1.00        | 0.998     | 1.001     | 0.29    |                      |
|                                                             |                                                    | Stimulus location (right)   | 1.07        | 0.88      | 1.30      | 0.51    |                      |
|                                                             |                                                    | Genotype x Sex              | 0.95        | 0.63      | 1.44      | 0.81    |                      |
|                                                             |                                                    | Genotype x Session          | 0.98        | 0.96      | 1.01      | 0.13    |                      |
| Trial outcome in extinction learning (response or omission) | Mixed-effect generalized linear model (logit link) | Genotype                    | 0.84        | 0.64      | 1.09      | 0.19    | Figure 2F            |
|                                                             |                                                    | Sex                         | 1.23        | 0.95      | 1.59      | 0.11    |                      |
|                                                             |                                                    | Session                     | 0.53        | 0.50      | 0.57      | < 0.001 |                      |
|                                                             |                                                    | Trial within session        | 0.93        | 0.92      | 0.94      | < 0.001 |                      |
|                                                             |                                                    | Genotype x Sex              | 0.85        | 0.51      | 1.43      | 0.55    |                      |
|                                                             |                                                    | Genotype x Session          | 1.05        | 0.95      | 1.17      | 0.34    |                      |
| Trial outcome in PD (correct or incorrect)                  | Mixed-effect generalized linear model (logit link) | Genotype                    | 0.97        | 0.85      | 1.09      | 0.57    | Figure 2G            |
|                                                             |                                                    | Sex                         | 1.02        | 0.90      | 1.16      | 0.74    |                      |
|                                                             |                                                    | Session                     | 1.10        | 1.08      | 1.12      | <0.001  |                      |
|                                                             |                                                    | Trial within session        | 1.000       | 0.999     | 1.002     | 0.70    |                      |
|                                                             |                                                    | Stimulus location (right)   | 1.09        | 0.94      | 1.26      | 0.28    |                      |
|                                                             |                                                    | Correction trial            | 0.56        | 0.52      | 0.61      | <0.001  |                      |
|                                                             |                                                    | Genotype x Correction trial | 1.06        | 0.89      | 1.25      | 0.53    |                      |
| Trial outcome in PAL (correct or incorrect)                 | Mixed-effect generalized linear model (logit link) | Genotype                    | 0.91        | 0.80      | 1.04      | 0.17    | Figure 2G            |
|                                                             |                                                    | Sex                         | 1.06        | 0.94      | 1.21      | 0.35    |                      |
|                                                             |                                                    | Session                     | 1.04        | 1.03      | 1.04      | < 0.001 |                      |
|                                                             |                                                    | Trial within session        | 0.999       | 0.998     | 1.000     | 0.06    |                      |
|                                                             |                                                    | Stimulus location (center)  | 0.50        | 0.44      | 0.57      | < 0.001 |                      |
|                                                             |                                                    | Stimulus location (right)   | 1.11        | 0.94      | 1.31      | 0.21    |                      |
|                                                             |                                                    | Correction trial            | 0.73        | 0.68      | 0.77      | < 0.001 |                      |
| Genotype x Correction trial                                 | 1.00                                               | 0.87                        | 1.14        | 0.95      |           |         |                      |
| Trial outcome in RL (correct or incorrect)                  | Mixed-effect generalized linear model (logit link) | Genotype                    | 0.94        | 0.81      | 1.10      | 0.43    | Figure 2G            |
|                                                             |                                                    | Sex                         | 1.16        | 1.00      | 1.34      | 0.04    |                      |
|                                                             |                                                    | Session                     | 1.10        | 1.09      | 1.11      | < 0.001 |                      |
|                                                             |                                                    | Trial within session        | 0.999       | 0.998     | 1.000     | 0.24    |                      |
|                                                             |                                                    | Stimulus location (right)   | 1.03        | 0.90      | 1.17      | 0.70    |                      |
|                                                             |                                                    | Correction trial            | 0.75        | 0.70      | 0.80      | < 0.001 |                      |
|                                                             |                                                    | Genotype x Correction trial | 0.95        | 0.81      | 1.10      | 0.48    |                      |

|                                                |                                                             |                              |         |         |         |         |           |
|------------------------------------------------|-------------------------------------------------------------|------------------------------|---------|---------|---------|---------|-----------|
| Trial outcome in PD<br>(correct or incorrect)  | Mixed-effect<br>generalized<br>linear model<br>(logit link) | Genotype                     | 0.94    | 0.81    | 1.10    | 0.47    | Figure 2G |
|                                                |                                                             | Sex                          | 1.07    | 0.92    | 1.25    | 0.37    |           |
|                                                |                                                             | Session                      | 1.11    | 1.09    | 1.13    | < 0.001 |           |
|                                                |                                                             | Trial within session         | 1.00    | 0.998   | 1.002   | 0.92    |           |
|                                                |                                                             | Stimulus location (right)    | 1.08    | 0.92    | 1.28    | 0.34    |           |
|                                                |                                                             | Reoccurring trial            | 1.12    | 1.04    | 1.21    | < 0.001 |           |
|                                                |                                                             | Genotype x Reoccurring trial | 1.12    | 0.97    | 1.31    | 0.13    |           |
| Trial outcome in PAL<br>(correct or incorrect) | Mixed-effect<br>generalized<br>linear model<br>(logit link) | Genotype                     | 0.91    | 0.77    | 1.08    | 0.28    | Figure 2G |
|                                                |                                                             | Sex                          | 1.12    | 0.95    | 1.32    | 0.18    |           |
|                                                |                                                             | Session                      | 1.03    | 1.03    | 1.04    | < 0.001 |           |
|                                                |                                                             | Trial within session         | 1.000   | 0.999   | 1.001   | 1.00    |           |
|                                                |                                                             | Stimulus location (center)   | 0.46    | 0.39    | 0.54    | < 0.001 |           |
|                                                |                                                             | Stimulus location (right)    | 1.07    | 0.85    | 1.34    | 0.58    |           |
|                                                |                                                             | Reoccurring trial            | 1.20    | 1.13    | 1.28    | < 0.001 |           |
| Genotype x Reoccurring trial                   | 0.97                                                        | 0.85                         | 1.11    | 0.64    |         |         |           |
| Trial outcome in RL<br>(correct or incorrect)  | Mixed-effect<br>generalized<br>linear model<br>(logit link) | Genotype                     | 0.98    | 0.79    | 1.21    | 0.86    | Figure 2G |
|                                                |                                                             | Sex                          | 1.18    | 0.97    | 1.45    | 0.10    |           |
|                                                |                                                             | Session                      | 1.10    | 1.08    | 1.11    | < 0.001 |           |
|                                                |                                                             | Trial within session         | 0.999   | 0.998   | 1.000   | 0.19    |           |
|                                                |                                                             | Stimulus location (right)    | 1.07    | 0.88    | 1.30    | 0.51    |           |
|                                                |                                                             | Reoccurring trial            | 1.21    | 1.14    | 1.29    | < 0.001 |           |
|                                                |                                                             | Genotype x Reoccurring trial | 0.96    | 0.85    | 1.08    | 0.49    |           |
| Initiation latency in<br>PD                    | Quantile<br>regression<br>(median)                          | Genotype                     | 1.13    | 0.48    | 1.77    | 0.001   | Figure 3B |
|                                                |                                                             | Sex                          | -0.12   | -0.75   | 0.52    | 0.72    |           |
|                                                |                                                             | Session                      | -0.35   | -0.43   | -0.28   | < 0.001 |           |
|                                                |                                                             | Trial within session         | 0.02    | 0.01    | 0.03    | < 0.001 |           |
|                                                |                                                             | Stimulus location (right)    | -0.07   | -0.23   | 0.08    | 0.35    |           |
|                                                |                                                             | Correction trial             | -1.25   | -1.57   | -0.93   | < 0.001 |           |
|                                                |                                                             | Genotype x Sex               | -0.19   | -1.44   | 1.06    | 0.77    |           |
| Initiation latency in<br>RL                    | Quantile<br>regression<br>(median)                          | Genotype                     | 0.87    | 0.36    | 1.37    | 0.001   | Figure 3B |
|                                                |                                                             | Sex                          | 0.16    | -0.25   | 0.57    | 0.45    |           |
|                                                |                                                             | Session                      | -0.14   | -0.17   | -0.12   | < .001  |           |
|                                                |                                                             | Trial within session         | 0.020   | 0.015   | 0.024   | < 0.001 |           |
|                                                |                                                             | Stimulus location (right)    | -0.02   | -0.11   | 0.07    | 0.639   |           |
|                                                |                                                             | Correction trial             | -0.31   | -0.48   | -0.15   | < 0.001 |           |
|                                                |                                                             | Genotype x Sex               | 0.17    | -0.82   | 1.17    | 0.734   |           |
| Initiation latency in<br>PAL                   | Quantile<br>regression<br>(median)                          | Genotype                     | 0.42    | 0.04    | 0.79    | 0.03    | Figure 3B |
|                                                |                                                             | Sex                          | 0.03    | -0.27   | 0.33    | 0.839   |           |
|                                                |                                                             | Session                      | -0.025  | -0.030  | -0.021  | < 0.001 |           |
|                                                |                                                             | Trial within session         | 0.016   | 0.012   | 0.019   | < 0.001 |           |
|                                                |                                                             | Stimulus location (center)   | 0.05    | 0.00    | 0.10    | 0.063   |           |
|                                                |                                                             | Stimulus location (right)    | -0.01   | -0.06   | 0.04    | 0.61    |           |
|                                                |                                                             | Correction trial             | -0.17   | -0.30   | -0.03   | 0.013   |           |
| Genotype x Sex                                 | -0.14                                                       | -0.89                        | 0.61    | 0.714   |         |         |           |
| Reward collection<br>latency in PD             | Quantile<br>regression<br>(median)                          | Genotype                     | 0.13    | 0.07    | 0.19    | < 0.001 | Figure 3C |
|                                                |                                                             | Sex                          | 0.02    | -0.04   | 0.09    | 0.44    |           |
|                                                |                                                             | Session                      | -0.012  | -0.016  | -0.009  | < 0.001 |           |
|                                                |                                                             | Trial within session         | -0.0006 | -0.0011 | -0.0001 | 0.02    |           |
|                                                |                                                             | Stimulus location (right)    | -0.01   | -0.04   | 0.01    | 0.34    |           |
|                                                |                                                             | Correction trial             | -0.02   | -0.03   | -0.01   | < 0.001 |           |
|                                                |                                                             | Genotype x Sex               | 0.01    | -0.03   | 0.04    | 0.71    |           |
| Reward collection<br>latency in RL             | Quantile<br>regression<br>(median)                          | Genotype                     | 0.13    | 0.07    | 0.19    | < 0.001 | Figure 3C |
|                                                |                                                             | Sex                          | 0.00    | -0.06   | 0.05    | 0.89    |           |
|                                                |                                                             | Session                      | -0.002  | -0.004  | 0.000   | 0.12    |           |
|                                                |                                                             | Trial within session         | -0.0008 | -0.0013 | -0.0004 | < 0.001 |           |
|                                                |                                                             | Stimulus location (right)    | 0.01    | -0.01   | 0.04    | 0.31    |           |
|                                                |                                                             | Correction trial             | -0.01   | -0.03   | 0.00    | 0.02    |           |
| Genotype x Sex                                 | -0.01                                                       | -0.14                        | 0.12    | 0.90    |         |         |           |

|                                   |                              |                            |         |         |        |         |               |
|-----------------------------------|------------------------------|----------------------------|---------|---------|--------|---------|---------------|
| Reward collection latency in PAL  | Quantile regression (median) | Genotype                   | 0.07    | 0.02    | 0.13   | 0.01    | Figure 3C     |
|                                   |                              | Sex                        | 0.02    | -0.04   | 0.08   | 0.53    |               |
|                                   |                              | Session                    | 0.000   | -0.001  | 0.002  | 0.54    |               |
|                                   |                              | Trial within session       | -0.0001 | -0.0005 | 0.0003 | 0.74    |               |
|                                   |                              | Stimulus location (center) | -0.05   | -0.08   | -0.03  | < 0.001 |               |
|                                   |                              | Stimulus location (right)  | -0.02   | -0.05   | 0.02   | 0.41    |               |
|                                   |                              | Correction trial           | -0.02   | -0.03   | -0.01  | < 0.001 |               |
|                                   |                              | Genotype x Sex             | 0.02    | -0.10   | 0.13   | 0.79    |               |
| Stimulus-approach latency in PD   | Quantile regression (median) | Genotype                   | 0.06    | -0.02   | 0.13   | 0.14    | Figure 3D     |
|                                   |                              | Sex                        | -0.05   | -0.13   | 0.02   | 0.16    |               |
|                                   |                              | Session                    | -0.032  | -0.038  | -0.026 | < 0.001 |               |
|                                   |                              | Trial within session       | -0.0007 | -0.0014 | 0      | 0.06    |               |
|                                   |                              | Stimulus location (right)  | 0.00    | -0.02   | 0.01   | 0.59    |               |
|                                   |                              | Correction trial           | 0.05    | 0.03    | 0.07   | < 0.001 |               |
|                                   |                              | Genotype x Sex             | -0.04   | -0.18   | 0.11   | 0.63    |               |
| Stimulus-approach latency in RL   | Quantile regression (median) | Genotype                   | 0.07    | -0.01   | 0.15   | 0.08    | Figure 3D     |
|                                   |                              | Sex                        | -0.01   | -0.09   | 0.06   | 0.71    |               |
|                                   |                              | Session                    | -0.02   | -0.02   | -0.02  | < 0.001 |               |
|                                   |                              | Trial within session       | -0.0002 | -0.0010 | 0.0005 | 0.53    |               |
|                                   |                              | Stimulus location (right)  | 0.00    | -0.01   | 0.02   | 0.67    |               |
|                                   |                              | Correction trial           | 0.02    | 0.00    | 0.04   | 0.02    |               |
|                                   |                              | Genotype x Sex             | -0.02   | -0.19   | 0.14   | 0.77    |               |
| Stimulus-approach latency in PAL  | Quantile regression (median) | Genotype                   | 0.01    | -0.07   | 0.09   | 0.74    | Figure 3D     |
|                                   |                              | Sex                        | -0.06   | -0.14   | 0.02   | 0.18    |               |
|                                   |                              | Session                    | -0.002  | -0.003  | -0.001 | 0.002   |               |
|                                   |                              | Trial within session       | 0.0010  | 0.0005  | 0.0015 | < 0.001 |               |
|                                   |                              | Stimulus location (center) | 0.03    | 0.02    | 0.04   | < 0.001 |               |
|                                   |                              | Stimulus location (right)  | -0.01   | -0.02   | 0.00   | 0.20    |               |
|                                   |                              | Correction trial           | 0.03    | 0.02    | 0.05   | < 0.001 |               |
|                                   |                              | Genotype x Sex             | -0.03   | -0.20   | 0.14   | 0.72    |               |
| Stimulus-selection latency in PD  | Quantile regression (median) | Genotype                   | -0.07   | -0.27   | 0.13   | 0.51    | Figure 3E     |
|                                   |                              | Sex                        | -0.04   | -0.24   | 0.16   | 0.70    |               |
|                                   |                              | Session                    | -0.02   | -0.03   | 0.00   | 0.04    |               |
|                                   |                              | Trial within session       | -0.002  | -0.004  | -0.001 | 0.01    |               |
|                                   |                              | Stimulus location (right)  | 0.02    | -0.09   | 0.12   | 0.75    |               |
|                                   |                              | Correction trial           | -0.15   | -0.21   | -0.09  | < 0.001 |               |
|                                   |                              | Genotype x Sex             | 0.31    | -0.07   | 0.70   | 0.11    |               |
| Stimulus-selection latency in RL  | Quantile regression (median) | Genotype                   | -0.03   | -0.25   | 0.19   | 0.80    | Figure 3E     |
|                                   |                              | Sex                        | 0.04    | -0.17   | 0.25   | 0.73    |               |
|                                   |                              | Session                    | -0.02   | -0.03   | -0.01  | 0.000   |               |
|                                   |                              | Trial within session       | 0.0010  | -0.0006 | 0.0026 | 0.23    |               |
|                                   |                              | Stimulus location (right)  | 0.039   | -0.036  | 0.113  | 0.31    |               |
|                                   |                              | Correction trial           | -0.05   | -0.09   | -0.02  | 0.004   |               |
|                                   |                              | Genotype x Sex             | 0.20    | -0.22   | 0.62   | 0.36    |               |
| Stimulus-selection latency in PAL | Quantile regression (median) | Genotype                   | 0.00    | -0.18   | 0.17   | 0.96    | Figure 3E     |
|                                   |                              | Sex                        | 0.06    | -0.11   | 0.23   | 0.46    |               |
|                                   |                              | Session                    | 0.005   | 0.002   | 0.009  | 0.01    |               |
|                                   |                              | Trial within session       | -0.0003 | -0.0014 | 0.0007 | 0.52    |               |
|                                   |                              | Stimulus location (center) | 0.29    | 0.20    | 0.39   | < 0.001 |               |
|                                   |                              | Stimulus location (right)  | -0.26   | -0.41   | -0.12  | < 0.001 |               |
|                                   |                              | Correction trial           | 0.01    | -0.03   | 0.06   | 0.53    |               |
|                                   |                              | Genotype x Sex             | 0.10    | -0.24   | 0.45   | 0.56    |               |
| Total number of responses FR1     | Quantile regression (median) | Genotype                   | -7      | -27.30  | 13.30  | 0.50    | Figure 4B - C |
|                                   |                              | Sex                        | 20      | -0.26   | 40.26  | 0.053   |               |
|                                   |                              | Session                    | 2       | -4.00   | 8.00   | 0.51    |               |
|                                   |                              | Genotype x Sex             | 8       | -31.16  | 47.16  | 0.69    |               |

|                                                                                              |                                                    |                                                         |         |         |         |         |                          |
|----------------------------------------------------------------------------------------------|----------------------------------------------------|---------------------------------------------------------|---------|---------|---------|---------|--------------------------|
| Total number of responses FR5                                                                | Quantile regression (median)                       | Genotype                                                | -215    | -342.62 | -87.38  | < 0.001 | Figure 4B - C            |
|                                                                                              |                                                    | Sex                                                     | 55      | -62.15  | 172.15  | 0.36    |                          |
|                                                                                              |                                                    | Session                                                 | 80      | 41.82   | 118.18  | < 0.001 |                          |
|                                                                                              |                                                    | Genotype x Sex                                          | 127.5   | -120.71 | 375.71  | 0.31    |                          |
| Total number of responses FR20                                                               | Quantile regression (median)                       | Genotype                                                | -491    | -723.19 | -258.81 | < 0.001 | Figure 4B - C            |
|                                                                                              |                                                    | Sex                                                     | 81      | -119.91 | 281.91  | 0.43    |                          |
|                                                                                              |                                                    | Session                                                 | -49     | -87.32  | -10.68  | 0.01    |                          |
|                                                                                              |                                                    | Genotype x Sex                                          | -36     | -510.65 | 438.65  | 0.88    |                          |
| Total number of responses FR40                                                               | Quantile regression (median)                       | Genotype                                                | -442    | -617.02 | -266.98 | < 0.001 | Figure 4B - C            |
|                                                                                              |                                                    | Sex                                                     | -20     | -149.25 | 109.25  | 0.76    |                          |
|                                                                                              |                                                    | Session                                                 | -58     | -84.51  | -31.49  | < 0.001 |                          |
|                                                                                              |                                                    | Genotype x Sex                                          | 223     | -106.71 | 552.71  | 0.18    |                          |
| Total number of responses FR20 (water rewards)                                               | Mixed-effect linear regression                     | Genotype                                                | -230.50 | -312.36 | -148.64 | < 0.001 | Figure 4F<br>Figure S13A |
|                                                                                              |                                                    | Sex                                                     | 16.51   | -54.72  | 87.74   | 0.65    |                          |
|                                                                                              |                                                    | Session                                                 | -12.73  | -28.75  | 3.30    | 0.12    |                          |
|                                                                                              |                                                    | Water-restricted weight                                 | 4.01    | -7.84   | 15.87   | 0.51    |                          |
|                                                                                              |                                                    | Genotype x Sex                                          | 155.27  | 19.24   | 291.30  | 0.03    |                          |
|                                                                                              |                                                    | Genotype (female)                                       | -312.65 | -427.37 | -197.93 | < 0.001 |                          |
|                                                                                              |                                                    | Genotype (male)                                         | -166.66 | -275.64 | -57.68  | 0.003   |                          |
| Correlation between responses for water and milk rewards                                     | Linear regression                                  | Responses for milk (WT)                                 | 0.31    | 0.17    | 0.45    | < 0.001 | Figure 4G<br>Figure S13B |
|                                                                                              |                                                    | Responses for milk ( <i>Nlgn1<sup>-/-</sup></i> )       | 0.20    | 0.10    | 0.31    | 0.001   |                          |
|                                                                                              |                                                    | Responses for milk (female WT)                          | 0.31    | 0.06    | 0.55    | 0.018   |                          |
|                                                                                              |                                                    | Responses for milk (male WT)                            | 0.36    | 0.22    | 0.51    | 0.000   |                          |
|                                                                                              |                                                    | Responses for milk (female <i>Nlgn1<sup>-/-</sup></i> ) | 0.16    | 0.05    | 0.26    | 0.007   |                          |
|                                                                                              |                                                    | Responses for milk (male <i>Nlgn1<sup>-/-</sup></i> )   | 0.21    | 0.05    | 0.37    | 0.012   |                          |
| Ambulatory distance spontaneous locomotor activity in open field (operant experience cohort) | Mixed-effect generalized linear model (log link)   | Genotype                                                | 0.78    | 0.71    | 0.86    | < 0.001 | Figure 5C                |
|                                                                                              |                                                    | Sex                                                     | 0.91    | 0.82    | 1.00    | 0.06    |                          |
|                                                                                              |                                                    | Time (5-minute block)                                   | 0.95    | 0.94    | 0.96    | < 0.001 |                          |
|                                                                                              |                                                    | Cohort                                                  | 1.01    | 0.90    | 1.12    | 0.88    |                          |
|                                                                                              |                                                    | Genotype x Sex                                          | 1.12    | 0.91    | 1.38    | 0.27    |                          |
|                                                                                              |                                                    | Genotype x Time                                         | 0.98    | 0.96    | 1.00    | 0.06    |                          |
|                                                                                              |                                                    | Genotype x Cohort                                       | 0.94    | 0.75    | 1.18    | 0.60    |                          |
| Resting time spontaneous locomotor activity in open field (operant experience cohort)        | Mixed-effect linear regression                     | Genotype                                                | 11.78   | 5.34    | 18.22   | < 0.001 | Figure 5D                |
|                                                                                              |                                                    | Sex                                                     | 5.18    | -1.40   | 11.75   | 0.12    |                          |
|                                                                                              |                                                    | Time (5-minute block)                                   | 4.26    | 3.73    | 4.79    | < 0.001 |                          |
|                                                                                              |                                                    | Cohort                                                  | -0.84   | -7.89   | 6.21    | 0.82    |                          |
|                                                                                              |                                                    | Genotype x Sex                                          | -4.54   | -17.81  | 8.73    | 0.50    |                          |
|                                                                                              |                                                    | Genotype x Time                                         | 0.58    | -0.47   | 1.64    | 0.28    |                          |
| Ambulatory velocity spontaneous locomotor activity in open field (operant experience cohort) | Mixed-effect linear regression                     | Genotype                                                | 0.38    | -0.71   | 1.48    | 0.49    | Figure 5E                |
|                                                                                              |                                                    | Sex                                                     | -0.32   | -1.43   | 0.78    | 0.56    |                          |
|                                                                                              |                                                    | Time (5-minute block)                                   | -0.27   | -1.43   | 0.89    | 0.65    |                          |
|                                                                                              |                                                    | Cohort                                                  | 0.40    | 0.28    | 0.53    | < 0.001 |                          |
|                                                                                              |                                                    | Genotype x Sex                                          | 1.49    | -0.79   | 3.77    | 0.20    |                          |
|                                                                                              |                                                    | Genotype x Time                                         | -0.22   | -0.48   | 0.04    | 0.09    |                          |
|                                                                                              |                                                    | Genotype x Cohort                                       | -0.44   | -2.68   | 1.79    | 0.70    |                          |
| Total mobility time in Porsolt swim test                                                     | Linear regression                                  | Genotype                                                | 35.81   | 14.12   | 57.51   | < 0.001 | Figure 5F                |
|                                                                                              |                                                    | Sex                                                     | 5.58    | -16.12  | 27.27   | 0.61    |                          |
|                                                                                              |                                                    | Genotype x Sex                                          | 5.16    | -38.76  | 49.09   | 0.81    |                          |
| Trial outcome in PD (correct or incorrect)                                                   | Mixed-effect generalized linear model (logit link) | Genotype                                                | 0.96    | 0.85    | 1.08    | 0.49    | Figure S7                |
|                                                                                              |                                                    | Sex                                                     | 1.03    | 0.91    | 1.17    | 0.62    |                          |
|                                                                                              |                                                    | Session                                                 | 1.10    | 1.08    | 1.13    | < 0.001 |                          |
|                                                                                              |                                                    | Trial within session                                    | 1.000   | 0.999   | 1.002   | 0.60    |                          |
|                                                                                              |                                                    | Stimulus location (right)                               | 1.08    | 0.93    | 1.26    | 0.30    |                          |
|                                                                                              |                                                    | Stimulus-selection latency                              | 1.07    | 1.03    | 1.10    | < 0.001 |                          |
|                                                                                              |                                                    | Correction trial                                        | 0.56    | 0.52    | 0.61    | < 0.001 |                          |

|                                                                                                               |                                                             |                                      |         |         |        |         |             |
|---------------------------------------------------------------------------------------------------------------|-------------------------------------------------------------|--------------------------------------|---------|---------|--------|---------|-------------|
| Trial outcome in PAL<br>(correct or incorrect)                                                                | Mixed-effect<br>generalized<br>linear model<br>(logit link) | Genotype                             | 0.91    | 0.80    | 1.04   | 0.16    | Figure S7   |
|                                                                                                               |                                                             | Sex                                  | 1.06    | 0.94    | 1.20   | 0.34    |             |
|                                                                                                               |                                                             | Session                              | 1.038   | 1.034   | 1.042  | < 0.001 |             |
|                                                                                                               |                                                             | Trial within session                 | 0.999   | 0.998   | 1.000  | 0.04    |             |
|                                                                                                               |                                                             | Stimulus location (center)           | 0.49    | 0.43    | 0.56   | < 0.001 |             |
|                                                                                                               |                                                             | Stimulus location (right)            | 1.13    | 0.95    | 1.33   | 0.17    |             |
|                                                                                                               |                                                             | Stimulus-selection latency           | 1.07    | 1.04    | 1.10   | < 0.001 |             |
|                                                                                                               |                                                             | Correction trial                     | 0.72    | 0.68    | 0.77   | < 0.001 |             |
| Trial outcome in RL<br>(correct or incorrect)                                                                 | Mixed-effect<br>generalized<br>linear model<br>(logit link) | Genotype                             | 0.95    | 0.83    | 1.08   | 0.40    | Figure S7   |
|                                                                                                               |                                                             | Sex                                  | 1.16    | 1.02    | 1.32   | 0.02    |             |
|                                                                                                               |                                                             | Session                              | 1.10    | 1.09    | 1.12   | < 0.001 |             |
|                                                                                                               |                                                             | Trial within session                 | 0.999   | 0.998   | 1.000  | 0.17    |             |
|                                                                                                               |                                                             | Stimulus location (right)            | 1.02    | 0.90    | 1.17   | 0.73    |             |
|                                                                                                               |                                                             | Stimulus-selection latency           | 1.04    | 1.01    | 1.06   | 0.01    |             |
|                                                                                                               |                                                             | Correction trial                     | 0.74    | 0.70    | 0.79   | < 0.001 |             |
| Trial outcome in PD<br>(correct or incorrect)                                                                 | Mixed-effect<br>generalized<br>linear model<br>(logit link) | Genotype                             | 0.97    | 0.85    | 1.10   | 0.59    | Figure S7   |
|                                                                                                               |                                                             | Sex                                  | 1.02    | 0.90    | 1.16   | 0.76    |             |
|                                                                                                               |                                                             | Session                              | 1.10    | 1.08    | 1.12   | < 0.001 |             |
|                                                                                                               |                                                             | Trial within session                 | 1.000   | 0.999   | 1.002  | 0.73    |             |
|                                                                                                               |                                                             | Stimulus location (right)            | 1.09    | 0.94    | 1.26   | 0.28    |             |
|                                                                                                               |                                                             | Stimulus-approach latency            | 1.00    | 0.98    | 1.01   | 0.54    |             |
|                                                                                                               |                                                             | Correction trial                     | 0.56    | 0.52    | 0.61   | < 0.001 |             |
| Trial outcome in PAL<br>(correct or incorrect)                                                                | Mixed-effect<br>generalized<br>linear model<br>(logit link) | Genotype                             | 0.91    | 0.80    | 1.04   | 0.18    | Figure S7   |
|                                                                                                               |                                                             | Sex                                  | 1.06    | 0.93    | 1.20   | 0.38    |             |
|                                                                                                               |                                                             | Session                              | 1.038   | 1.034   | 1.042  | < 0.001 |             |
|                                                                                                               |                                                             | Trial within session                 | 0.999   | 0.998   | 1.000  | 0.08    |             |
|                                                                                                               |                                                             | Stimulus location (center)           | 0.50    | 0.44    | 0.57   | < 0.001 |             |
|                                                                                                               |                                                             | Stimulus location (right)            | 1.11    | 0.94    | 1.31   | 0.22    |             |
|                                                                                                               |                                                             | Stimulus-approach latency            | 0.99    | 0.98    | 1.00   | 0.01    |             |
|                                                                                                               |                                                             | Correction trial                     | 0.73    | 0.68    | 0.78   | < 0.001 |             |
| Trial outcome in RL<br>(correct or incorrect)                                                                 | Mixed-effect<br>generalized<br>linear model<br>(logit link) | Genotype                             | 0.94    | 0.80    | 1.11   | 0.47    | Figure S7   |
|                                                                                                               |                                                             | Sex                                  | 1.16    | 0.99    | 1.35   | 0.06    |             |
|                                                                                                               |                                                             | Session                              | 1.10    | 1.09    | 1.11   | < 0.001 |             |
|                                                                                                               |                                                             | Trial within session                 | 0.999   | 0.998   | 1.000  | 0.22    |             |
|                                                                                                               |                                                             | Stimulus location (right)            | 1.03    | 0.90    | 1.17   | 0.70    |             |
|                                                                                                               |                                                             | Stimulus-approach latency            | 0.99    | 0.98    | 1.00   | 0.13    |             |
|                                                                                                               |                                                             | Correction trial                     | 0.75    | 0.70    | 0.80   | < 0.001 |             |
| Total number of<br>responses<br>progressive ratio                                                             | Quantile<br>regression<br>(median)                          | Genotype                             | -112.60 | -191.89 | -33.31 | 0.01    | Figure S12  |
|                                                                                                               |                                                             | Sex                                  | 20.00   | -57.86  | 97.86  | 0.61    |             |
|                                                                                                               |                                                             | Session                              | -9.40   | -19.13  | 0.33   | 0.06    |             |
|                                                                                                               |                                                             | Cohort                               | -96.60  | -172.44 | -20.76 | 0.01    |             |
|                                                                                                               |                                                             | Genotype x Sex                       | -8.40   | -175.99 | 159.19 | 0.92    |             |
|                                                                                                               |                                                             | Genotype x Cohort                    | 127.75  | -8.84   | 264.34 | 0.07    |             |
| Ambulatory distance<br>spontaneous<br>locomotor activity in<br>open field<br>(experimentally<br>naive cohort) | Mixed-effect<br>generalized<br>linear model<br>(log link)   | Genotype                             | 0.93    | 0.82    | 1.05   | 0.24    | Figure S14A |
|                                                                                                               |                                                             | Sex                                  | 0.92    | 0.81    | 1.04   | 0.17    |             |
|                                                                                                               |                                                             | Time (5-minute block)                | 0.91    | 0.90    | 0.92   | < 0.001 |             |
|                                                                                                               |                                                             | Genotype x Sex                       | 1.15    | 0.89    | 1.49   | 0.28    |             |
|                                                                                                               |                                                             | Genotype x Time                      | 0.97    | 0.95    | 0.99   | 0.01    |             |
|                                                                                                               |                                                             | Time (WT)                            | 0.925   | 0.915   | 0.934  | < 0.001 |             |
|                                                                                                               |                                                             | Time ( <i>Nlgn1</i> <sup>-/-</sup> ) | 0.90    | 0.88    | 0.92   | < 0.001 |             |
| Resting time<br>spontaneous<br>locomotor activity in<br>open field<br>(experimentally<br>naive cohort)        | Mixed-effect<br>linear<br>regression                        | Genotype                             | 7.32    | -0.78   | 15.42  | 0.08    | Figure S14B |
|                                                                                                               |                                                             | Sex                                  | 3.66    | -4.25   | 11.57  | 0.36    |             |
|                                                                                                               |                                                             | Time (5-minute block)                | 5.96    | 5.46    | 6.47   | < 0.001 |             |
|                                                                                                               |                                                             | Genotype x Sex                       | -12.89  | -28.67  | 2.89   | 0.11    |             |
|                                                                                                               |                                                             | Genotype x Time                      | 0.81    | -0.20   | 1.81   | 0.11    |             |

|                                                                                                |                                |                       |       |        |       |         |             |
|------------------------------------------------------------------------------------------------|--------------------------------|-----------------------|-------|--------|-------|---------|-------------|
| Ambulatory velocity spontaneous locomotor activity in open field (experimentally naive cohort) | Mixed-effect linear regression | Genotype              | 2.97  | 1.27   | 4.67  | 0.001   | Figure S14C |
|                                                                                                |                                | Sex                   | -0.13 | -1.89  | 1.63  | 0.89    |             |
|                                                                                                |                                | Time (5-minute block) | 0.15  | 0.01   | 0.29  | 0.04    |             |
|                                                                                                |                                | Genotype x Sex        | 0.49  | -3.04  | 4.02  | 0.79    |             |
|                                                                                                |                                | Genotype x Time       | 0.07  | -0.21  | 0.35  | 0.64    |             |
| Latency to fall accelerating rotarod                                                           | Mixed-effect linear regression | Session               | 9.58  | 7.93   | 11.23 | < 0.001 | Figure S15  |
|                                                                                                |                                | Genotype              | -8.31 | -28.90 | 12.29 | 0.43    |             |
|                                                                                                |                                | Sex                   | 12.39 | -8.02  | 32.80 | 0.23    |             |
|                                                                                                |                                | Cohort                | 46.96 | 26.97  | 66.95 | < 0.001 |             |
|                                                                                                |                                | Genotype x Sex        | 3.45  | -38.26 | 45.16 | 0.87    |             |
|                                                                                                |                                | Genotype x Cohort     | 1.86  | -39.16 | 42.88 | 0.93    |             |
